# Supplementary material for: Whole Genome Sequencing Based Taxonomic Classification, and Comparative Genomic Analysis of Potentially Human Pathogenic Enterobacter spp. Isolated from Chlorinated Wastewater in the North West Province, South Africa
Source: MDPI journal article supplement (doi:10.3390/microorganisms9091928), 2021-09-10
Supplement: s1 [file s1]

# Supporting Information 1a. Pathogenic Families Matched by isolate S4

| Organism                                                                                 | Accession Number | Matched Pathogenic Protein Family                                                           | Identity % |
|------------------------------------------------------------------------------------------|------------------|---------------------------------------------------------------------------------------------|------------|
| Yersinia pestis Pestoides F plasmid MT, complete sequence.                               | CP000670         | conjugative transfer oriT nicking-unwinding protein                                         | 98         |
| Yersinia pestis biovar Microtus str. 91001 plasmid pMT1, complete sequence.              | AE017045         | putative DNA-binding protein                                                                | 96.99      |
| Salmonella enterica subsp. arizonae serovar 62:z4,z23:-- , complete genome.              | CP000880         | hypothetical protein                                                                        | 97.07      |
| Escherichia coli str. K12 substr. DH10B, complete genome.                                | CP000948         | CP4-6 prophage; predicted dehydratase                                                       | 97.86      |
| Escherichia fergusonii ATCC 35469 chromosome, complete genome.                           | CU928158         | inorganic polyphosphate/ATP-NAD kinase                                                      | 96.23      |
| Klebsiella pneumoniae NTUH-K2044 DNA, complete genome.                                   | AP006725         | 4-hydroxyphenylacetate 3-hydroxylase Group II intron-encoded reverse transcriptase/maturase | 97.88      |
| Escherichia coli IAI39 chromosome, complete genome.                                      | CU928164         |                                                                                             | 100        |
| Citrobacter koseri ATCC BAA-895, complete genome.                                        | CP000822         | hypothetical protein                                                                        | 97.05      |
| Escherichia coli UTI89, complete genome.                                                 | CP000243         | galactose-proton symporter                                                                  | 95.27      |
| Klebsiella pneumoniae 342, complete genome.                                              | CP000964         | ascorbate-specific permease IIC component                                                   | 96.14      |
| Escherichia coli str. K12 substr. DH10B, complete genome.                                | CP000948         | CP4-6 prophage; predicted sugar transporter                                                 | 98.7       |
| Salmonella enterica subsp. arizonae serovar 62:z4,z23:-- , complete genome.              | CP000880         | hypothetical protein                                                                        | 96.8       |
| Yersinia pestis biovar Microtus str. 91001 plasmid pMT1, complete sequence.              | AE017045         | putative partitioning protein A                                                             | 97.26      |
| Klebsiella pneumoniae subsp. pneumoniae MGH 78578, complete sequence.                    | CP000647         | putative permease (MFS superfamily)                                                         | 95.88      |
| Escherichia coli UTI89, complete genome.                                                 | CP000243         | Nucleoside permease NupC                                                                    | 95.19      |
| Citrobacter koseri ATCC BAA-895, complete genome.                                        | CP000822         | hypothetical protein                                                                        | 96.69      |
| Klebsiella pneumoniae NTUH-K2044 DNA, complete genome.                                   | AP006725         | pyrroloquinoline quinone synthesis protein E                                                | 95.53      |
| Salmonella enterica subsp. enterica serovar Dublin str. C                                | CP001143         | 2021853 plasmid pCT0202185                                                                  | 96.92      |
| Escherichia coli 042 complete genome.                                                    | FN554766         | putative transposase                                                                        | 99.72      |
| Shigella boydii CDC 3083-94, complete genome.                                            | CP001063         | DNA replication and repair protein RecF                                                     | 95.24      |
| Escherichia coli APEC O1, complete genome.                                               | CP000468         | UDP-galactose-4-epimerase                                                                   | 95.27      |
| Klebsiella pneumoniae subsp. pneumoniae MGH 78578, complete sequence.                    | CP000647         | 3-phenylpropionate dioxygenase, alpha subunit                                               | 95.59      |
| Salmonella enterica subsp. arizonae serovar 62:z4,z23:-- , complete genome.              | CP000880         | hypothetical protein                                                                        | 97.34      |
| Citrobacter koseri ATCC BAA-895, complete genome.                                        | CP000822         | hypothetical protein                                                                        | 96.66      |
| Citrobacter koseri ATCC BAA-895, complete genome.                                        | CP000822         | hypothetical protein                                                                        | 95.38      |
| Escherichia coli UTI89, complete genome.                                                 | CP000243         | 30S ribosomal protein S2                                                                    | 97.51      |
| Escherichia fergusonii ATCC 35469 chromosome, complete genome.                           | CU928158         | RNA polymerase, sigma S (sigma 38) factor                                                   | 99.31      |
| Shigella flexneri 5 str. 8401, complete genome.                                          | CP000266         | conserved hypothetical protein                                                              | 96.23      |
| Klebsiella pneumoniae 342, complete genome.                                              | CP000964         | 3,4-dihydroxyphenylacetate 2,3-dioxygenase                                                  | 95.41      |
| Salmonella enterica subsp. enterica serovar Choleraesuis str. SC-B67, complete genome.   | AE017220         | transcriptional regulation of aerobic, anaerobic respiration, osmotic balance (CRP family)  | 98         |
| Citrobacter koseri ATCC BAA-895, complete genome.                                        | CP000822         | hypothetical protein                                                                        | 98.84      |
| Yersinia pestis Pestoides F plasmid MT, complete sequence.                               | CP000670         | conserved hypothetical protein                                                              | 99.24      |
| Citrobacter koseri ATCC BAA-895, complete genome.                                        | CP000822         | hypothetical protein                                                                        | 98.46      |
| Yersinia pestis biovar Microtus str. 91001 plasmid pMT1, complete sequence.              | AE017045         | hypothetical protein                                                                        | 97.3       |
| Salmonella enterica subsp. enterica serovar Paratyphi C strain RKS4594, complete genome. | CP000857         | L-ribulose-5-phosphate 4-epimerase                                                          | 95.67      |
| Yersinia pestis Pestoides F plasmid MT, complete sequence.                               | CP000670         | conjugative transfer fimbrial acetylation protein                                           | 99.59      |

## Continuation Supporting Information 1a

|                                                                                            |          |                                                                                      |       |
|--------------------------------------------------------------------------------------------|----------|--------------------------------------------------------------------------------------|-------|
| Salmonella enterica subsp. enterica serovar Newport str. SL254, complete genome.           | CP001113 | ribonuclease III                                                                     | 95.82 |
| Salmonella enterica subsp. arizonae serovar 62:z4,z23:-- , complete genome.                | CP000880 | hypothetical protein                                                                 | 98.55 |
| Escherichia coli 536, complete genome.                                                     | CP000247 | oligoribonuclease                                                                    | 95.58 |
| Salmonella enterica subsp. enterica serovar Choleraesuis str. SC-B67, complete genome.     | AE017220 | putative hexulose phosphate synthase (arabino hexulose phosphate formaldehyde lyase) | 96.3  |
| Yersinia pestis biovar Microtus str. 91001 plasmid pMT1, complete sequence.                | AE017045 | putative DNA methylase                                                               | 100   |
| Enterobacter sakazakii ATCC BAA-894, complete genome.                                      | CP000783 | hypothetical protein                                                                 | 98.27 |
| Salmonella enterica subsp. enterica serovar Schwarzengrund str. CVM19633, complete genome. | CP001127 | flavodoxin                                                                           | 96.02 |
| Escherichia coli UTI89, complete genome.                                                   | CP000243 | RNA polymerase sigma E                                                               | 98.95 |
| Citrobacter koseri ATCC BAA-895, complete genome.                                          | CP000822 | hypothetical protein                                                                 | 97.35 |
| Salmonella enterica subsp. enterica serovar Dublin str. C                                  | CP001144 | 2021853, complete genome.                                                            | 97.86 |
| Yersinia pestis biovar Microtus str. 91001 plasmid pMT1, complete sequence.                | AE017045 | putative antirestriction protein                                                     | 95.24 |
| Escherichia coli UTI89, complete genome.                                                   | CP000243 | 50S ribosomal subunit protein L13                                                    | 97.89 |
| Yersinia pestis biovar Microtus str. 91001 plasmid pMT1, complete sequence.                | AE017045 | hypothetical protein                                                                 | 98.56 |
| Enterobacter sakazakii ATCC BAA-894, complete genome.                                      | CP000783 | hypothetical protein                                                                 | 96.88 |
| Escherichia coli SMS-3-5, complete genome.                                                 | CP000970 | putative inner membrane protein YqjF                                                 | 95.38 |
| Klebsiella pneumoniae NTUH-K2044 DNA, complete genome.                                     | AP006725 | transcriptional repressor for methionine biosynthesis                                | 97.14 |
| Salmonella enterica subsp. enterica serovar Paratyphi C strain RKS4594, complete genome.   | CP000857 | co-chaperonin GroES                                                                  | 96.91 |
| Salmonella enterica subsp. enterica serovar Typhi str. CT18                                | XXX      | XXX                                                                                  | 100   |
| Escherichia coli 536, complete genome.                                                     | CP000247 | thioredoxin 1                                                                        | 98.17 |
| Escherichia coli 042 complete genome.                                                      | FN554766 | ribosome-binding factor A                                                            | 95.52 |
| Escherichia coli str. K12 substr. DH10B, complete genome.                                  | CP000948 | CP4-6 prophage; partial transposase of insertion element IS911A                      | 100   |
| Enterobacter sakazakii ATCC BAA-894 plasmid pESA2, complete sequence.                      | CP000784 | hypothetical protein                                                                 | 100   |
| Salmonella enterica subsp. enterica serovar Choleraesuis str. SC-B67, complete genome.     | AE017220 | chemotaxis regulator, transmits chemoreceptor signals to flagellar motor components  | 95.35 |
| Klebsiella pneumoniae NTUH-K2044 DNA, complete genome.                                     | AP006725 | preprotein translocase auxillary subunit                                             | 99.09 |
| Enterobacter sakazakii ATCC BAA-894 plasmid pESA2, complete sequence.                      | CP000784 | hypothetical protein                                                                 | 100   |
| Salmonella enterica subsp. arizonae serovar 62:z4,z23:-- , complete genome.                | CP000880 | hypothetical protein                                                                 | 97.44 |
| Salmonella enterica subsp. enterica serovar Newport str. SL254, complete genome.           | CP001113 | ascorbate-specific phosphotransferase enzyme IIB component                           | 98.02 |
| Salmonella enterica subsp. arizonae serovar 62:z4,z23:-- , complete genome.                | CP000880 | hypothetical protein                                                                 | 97.98 |
| Escherichia coli UTI89, complete genome.                                                   | CP000243 | conserved hypothetical protein YihD                                                  | 95.51 |
| Klebsiella pneumoniae NTUH-K2044 DNA, complete genome.                                     | AP006725 | cold shock protein                                                                   | 98.55 |
| Salmonella enterica subsp. enterica serovar Paratyphi A str. ATCC 9150, complete           |          |                                                                                      |       |

**Supporting Information 1b. Pathogenic Families Matched by Isolate S5**

| Organism                                                                                               | Accession Number | Matched Pathogenic Protein Family            | Identity % |
|--------------------------------------------------------------------------------------------------------|------------------|----------------------------------------------|------------|
| <i>Yersinia pestis</i> biovar <i>Microtus</i> str. 91001 plasmid pMT1, complete sequence.              | AE017045         | putative DNA-binding protein                 | 96.99      |
| <i>Salmonella enterica</i> subsp. <i>arizonae</i> serovar 62:z4,z23:-- , complete genome.              | CP000880         | hypothetical protein                         | 97.07      |
| <i>Escherichia coli</i> str. K12 substr. DH10B, complete genome.                                       | CP000948         | CP4-6 prophage; predicted dehydratase        | 97.86      |
| <i>Escherichia fergusonii</i> ATCC 35469 chromosome, complete genome.                                  | CU928158         | inorganic polyphosphate/ATP-NAD kinase       | 96.23      |
| <i>Klebsiella pneumoniae</i> NTUH-K2044 DNA, complete genome.                                          | AP006725         | 4-hydroxyphenylacetate 3-hydroxylase         | 97.88      |
| <i>Citrobacter koseri</i> ATCC BAA-895, complete genome.                                               | CP000822         | hypothetical protein                         | 97.05      |
| <i>Escherichia coli</i> UTI89, complete genome.                                                        | CP000243         | galactose-proton symporter                   | 95.27      |
| <i>Klebsiella pneumoniae</i> 342, complete genome.                                                     | CP000964         | ascorbate-specific permease IIC component    | 96.14      |
| <i>Escherichia coli</i> str. K12 substr. DH10B, complete genome.                                       | CP000948         | CP4-6 prophage; predicted sugar transporter  | 98.7       |
| <i>Salmonella enterica</i> subsp. <i>arizonae</i> serovar 62:z4,z23:-- , complete genome.              | CP000880         | hypothetical protein                         | 96.8       |
| <i>Yersinia pestis</i> biovar <i>Microtus</i> str. 91001 plasmid pMT1, complete sequence.              | AE017045         | putative partitioning protein A              | 97.26      |
| <i>Klebsiella pneumoniae</i> subsp. <i>pneumoniae</i> MGH 78578, complete sequence.                    | CP000647         | putative permease (MFS superfamily)          | 95.88      |
| <i>Escherichia coli</i> UTI89, complete genome.                                                        | CP000243         | Nucleoside permease NupC                     | 95.19      |
| <i>Citrobacter koseri</i> ATCC BAA-895, complete genome.                                               | CP000822         | hypothetical protein                         | 96.69      |
| <i>Klebsiella pneumoniae</i> NTUH-K2044 DNA, complete genome.                                          | AP006725         | pyrroloquinoline quinone synthesis protein E | 95.53      |
| <i>Salmonella enterica</i> subsp. <i>enterica</i> serovar Dublin str. C                                | CP001143         | 2021853 plasmid pCT0202185                   | 96.92      |
| <i>Shigella boydii</i> CDC 3083-94, complete genome.                                                   | CP001063         | DNA replication and repair protein RecF      | 95.24      |
| <i>Escherichia coli</i> APEC O1, complete genome.                                                      | CP000468         | UDP-galactose-4-epimerase                    | 95.27      |
| <i>Salmonella enterica</i> subsp. <i>arizonae</i> serovar 62:z4,z23:-- , complete genome.              | CP000880         | hypothetical protein                         | 97.34      |
| <i>Citrobacter koseri</i> ATCC BAA-895, complete genome.                                               | CP000822         | hypothetical protein                         | 96.66      |
| <i>Citrobacter koseri</i> ATCC BAA-895, complete genome.                                               | CP000822         | hypothetical protein                         | 95.38      |
| <i>Escherichia coli</i> UTI89, complete genome.                                                        | CP000243         | 30S ribosomal protein S2                     | 97.51      |
| <i>Shigella flexneri</i> 2002017, complete genome.                                                     | CP001383         | ISEhe3, transposase orfB                     | 95.19      |
| <i>Escherichia fergusonii</i> ATCC 35469 chromosome, complete genome.                                  | CU928158         | RNA polymerase, sigma S (sigma 38) factor    | 96.57      |
| <i>Shigella flexneri</i> 5 str. 8401, complete genome.                                                 | CP000266         | conserved hypothetical protein               | 96.23      |
| <i>Klebsiella pneumoniae</i> 342, complete genome.                                                     | CP000964         | 3,4-dihydroxyphenylacetate 2,3-dioxygenase   | 95.41      |
| <i>Escherichia coli</i> E24377A, complete genome.                                                      | CP000800         | pyruvate formate-lyase 1-activating enzyme   | 97.15      |
| <i>Citrobacter koseri</i> ATCC BAA-895, complete genome.                                               | CP000822         | hypothetical protein                         | 98.84      |
| <i>Citrobacter koseri</i> ATCC BAA-895, complete genome.                                               | CP000822         | hypothetical protein                         | 98.46      |
| <i>Yersinia pestis</i> biovar <i>Microtus</i> str. 91001 plasmid pMT1, complete sequence.              | AE017045         | hypothetical protein                         | 97.3       |
| <i>Salmonella enterica</i> subsp. <i>enterica</i> serovar Paratyphi C strain RKS4594, complete genome. | CP000857         | L-ribulose-5-phosphate 4-epimerase           | 95.67      |

## Continuation Supporting Information 1b

|                                                                                            |          |                                                                                      |       |
|--------------------------------------------------------------------------------------------|----------|--------------------------------------------------------------------------------------|-------|
| Salmonella enterica subsp. enterica serovar Newport str. SL254, complete genome.           | CP001113 | ribonuclease III                                                                     | 96.9  |
| Salmonella enterica subsp. arizonae serovar 62:z4,z23:-- , complete genome.                | CP000880 | hypothetical protein                                                                 | 98.55 |
| Escherichia coli 536, complete genome.                                                     | CP000247 | oligoribonuclease                                                                    | 95.58 |
| Salmonella enterica subsp. enterica serovar Choleraesuis str. SC-B67, complete genome.     | AE017220 | putative hexulose phosphate synthase (arabino hexulose phosphate formaldehyde lyase) | 96.3  |
| Yersinia pestis biovar Microtus str. 91001 plasmid pMT1, complete sequence.                | AE017045 | putative DNA methylase                                                               | 100   |
| Klebsiella pneumoniae NTUH-K2044 plasmid pK2044 DNA, complete genome.                      | AP006726 | hypothetical orf in IS2                                                              | 96.03 |
| Enterobacter sakazakii ATCC BAA-894, complete genome.                                      | CP000783 | hypothetical protein                                                                 | 98.27 |
| Salmonella enterica subsp. enterica serovar Schwarzengrund str. CVM19633, complete genome. | CP001127 | flavodoxin                                                                           | 96.02 |
| Escherichia coli UTI89, complete genome.                                                   | CP000243 | RNA polymerase sigma E                                                               | 98.95 |
| Shigella dysenteriae Sd197, complete genome.                                               | CP000034 | conserved hypothetical protein                                                       | 95    |
| Citrobacter koseri ATCC BAA-895, complete genome.                                          | CP000822 | hypothetical protein                                                                 | 97.35 |
| Salmonella enterica subsp. enterica serovar Dublin str. C                                  | CP001144 | 2021853, complete genome.                                                            | 97.86 |
| Salmonella enterica subsp. enterica serovar Paratyphi B str. SPB7, complete genome.        | CP000886 | hypothetical protein                                                                 | 95.04 |
| Yersinia pestis biovar Microtus str. 91001 plasmid pMT1, complete sequence.                | AE017045 | putative antirestriction protein                                                     | 95.24 |
| Yersinia pestis biovar Microtus str. 91001 plasmid pMT1, complete sequence.                | AE017045 | hypothetical protein                                                                 | 98.56 |
| Enterobacter sakazakii ATCC BAA-894, complete genome.                                      | CP000783 | hypothetical protein                                                                 | 96.88 |
| Escherichia coli SMS-3-5, complete genome.                                                 | CP000970 | putative inner membrane protein YqjF                                                 | 95.38 |
| Klebsiella pneumoniae NTUH-K2044 DNA, complete genome.                                     | AP006725 | transcriptional repressor for methionine biosynthesis                                | 97.14 |
| Salmonella enterica subsp. enterica serovar Paratyphi C strain RKS4594, complete genome.   | CP000857 | co-chaperonin GroES                                                                  | 96.91 |
| Escherichia coli 536, complete genome.                                                     | CP000247 | thioredoxin 1                                                                        | 98.17 |
| Escherichia coli 042 complete genome.                                                      | FN554766 | ribosome-binding factor A                                                            | 95.52 |
| Salmonella enterica subsp. enterica serovar Choleraesuis str. SC-B67, complete genome.     | AE017220 | chemotaxis regulator, transmits chemoreceptor signals to flagellar motor components  | 95.35 |
| Salmonella enterica subsp. enterica serovar Newport str. SL254, complete genome.           | CP001113 | histidine triad nucleotide-binding protein 2                                         | 94.96 |
| Salmonella enterica subsp. enterica serovar Paratyphi A str. ATCC 9150, complete genome.   | CP000026 | cell division protein FtsL                                                           | 95.04 |
| Klebsiella pneumoniae NTUH-K2044 DNA, complete genome.                                     | AP006725 | preprotein translocase auxillary subunit                                             | 99.09 |
| Salmonella enterica subsp. arizonae serovar 62:z4,z23:-- , complete genome.                | CP000880 | hypothetical protein                                                                 | 97.44 |
| Salmonella enterica subsp. enterica serovar Newport str. SL254, complete genome.           | CP001113 | ascorbate-specific phosphotransferase enzyme IIB component                           | 98.02 |
| Salmonella enterica subsp. arizonae serovar 62:z4,z23:-- , complete genome.                | CP000880 | hypothetical protein                                                                 | 97.98 |
| Escherichia coli UTI89, complete genome.                                                   | CP000243 | conserved hypothetical protein YihD                                                  | 95.51 |
| Klebsiella pneumoniae NTUH-K2044 DNA, complete genome.                                     | AP006725 | cold shock protein                                                                   | 98.55 |
| Salmonella enterica subsp. enterica serovar Paratyphi A str. ATCC 9150, complete genome.   | CP000026 | conserved hypothetical protein                                                       | 98.53 |
| Shigella dysenteriae Sd197, complete genome.                                               | CP000034 | conserved hypothetical protein                                                       | 97.01 |
| Yersinia pestis Pestoides F plasmid MT, complete sequence.                                 | CP000670 | conjugative transfer fimbrial synthesis protein                                      | 98.78 |
| Klebsiella pneumoniae NTUH-K2044 DNA, complete genome.                                     | AP006725 | putative cytoplasmic protein                                                         | 95.89 |
| Citrobacter koseri ATCC BAA-895, complete genome.                                          | CP000822 | hypothetical protein                                                                 | 96.1  |
| Klebsiella pneumoniae NTUH-K2044 DNA, complete genome.                                     | AP006725 | putative amino acid/amine transport protein                                          | 98.11 |
| Yersinia pestis biovar Microtus str. 91001 plasmid pMT1, complete sequence.                | AE017045 | hypothetical protein                                                                 | 98.63 |
